# Supplementary material for: Displacement between anterior chamber width obtained by swept-source anterior segment optical coherence tomography and white-to-white distance
Source: PLoS One. 2021 May 20;16(5):e0251990. doi: 10.1371/journal.pone.0251990 (PMC8136703; doi:10.1371/journal.pone.0251990)
Supplement: S1 Data — (XLSX) [file pone.0251990.s001.xlsx]

## Sheet: Sheet1
ID	laterality_casia	id_eye	STS	Gender	Ethnicity	newWTW	ATA	open	newAL
1	1	10047609_1	12.237	M	Caucasian	12.39	12.127	1	24.13
2	1	10049008_1	11.736	M	asian (vietnamese)	11.89	11.675	1	23.29
3	1	10240654_1	11.794	M	caucasian	12.26	11.867	1	26.53
4	2	1033603_2	12.25	M	caucasian	12.67	12.392	2	23.38
5	2	10668298_2	12.165	F	caucasian	11.97	12.234	1	24.14
6	2	10674298_2	11.858	M	caucasian	11.75	11.82	1	23.32
7	2	10694841_2	12.465	M	caucasian	12.4	12.465	1	23.77
8	2	10738059_2	11.145	F	chinese	11.34	11.174	1	23.97
9	1	10948312_1	12.396	M	latino (mexican)	12.03	12.331	1	24.77
10	2	11269974_2	11.499	F	iranian	11.55	11.414	2	22.9
11	2	11387233_2	11.153	M	asian (chinese)	11.49	10.822	2	22.9
12	2	11584977_2	12.903	M	caucasian (british)	12.82	12.645	1	22.81
13	2	11608701_2	12.166	F	belgian	12.42	12.124	1	23.82
14	2	11639879_2	11.621	F	chinese	11.3	11.387	1	25.45
15	1	11815774_1	11.65	F	iranian	11.72	11.598	1	22.9
16	1	11843026_1	11.831	M	filipino	11.84	11.88	1	25.83
17	2	11843026_2	11.759	M	filipino	11.85	11.842	1	25.99
18	2	11885748_2	11.117	F	asian (Chinese)	11.24	11.064	2	22.34
19	1	12339852_1	11.835	F	asian (chinese)	11.67	11.514	1	24.42
20	2	12436815_2	11.022	M	asian (chinese)	10.91	11.091	1	23.91
21	2	12505477_2	12.31	M	chinese	12.59	12.361	1	24.52
22	2	12523998_2	12.048	M	African american	12.33	12.155	1	27.46
23	2	1310526_2	11.378	F	Caucasian	11.66	11.99	1	22.34
24	2	1524941_2	12.519	M	caucasian	12.3	12.607	1	24.62
25	2	1674625_2	11.992	F	African american	11.63	11.789	1	24.37
26	1	1676903_1	11.158	F	chinese	11.29	11.074	1	24.26
27	2	1676903_2	11.255	F	chinese	11.53	11.076	1	24
28	2	1882619_2	12.102	F	Caucasian	11.45	12.221	1	25.22
29	1	1950061_1	11.418	F	filipino	11.63	11.383	2	21.77
30	1	20368691_1	11.376	M	asian (chinese)	11.57	11.196	2	24.57
31	1	20544988_1	10.814	F	caucasian	11.03	10.824	1	23.27
32	2	21071447_2	12.713	M	caucasian	12.63	12.762	1	24.4
33	1	21244848_1	11.457	F	Filipino	11.82	11.679	2	23.57
34	2	22130374_2	12.415	M	Caucasian	12.57	12.154	1	23.85
35	2	22341324_2	11.563	F	Caucasian (russian)	12.05	11.417	2	22.1
36	1	30211448_1	11.52	F	Korean	11.61	11.623	1	23.53
37	1	30273664_1	12.123	M	african american	12.4	12.216	1	25.23
38	2	3051358_2	11.496	F	African american	11.71	11.434	1	23.34
39	2	32174558_2	11.944	F	Russian	12.09	11.916	2	22.18
40	1	32424554_1	11.701	M	asian (Chinese)	11.65	11.326	1	23.98
41	1	32445268_1	11.191	F	Caucasian (jewish)	11.28	11.262	1	24.48
42	1	32550002_1	11.794	M	asian (Chinese)	11.82	11.572	2	24.23
43	1	32801242_1	11.203	F	caucasian	11.1	11.355	1	23.73
44	2	32813933_2	11.515	F	caucasian	11.61	11.576	2	22.63
45	1	33137206_1	11.749	F	chinese	11.85	11.817	2	22.66
46	2	33137206_2	11.79	F	chinese	11.72	11.834	2	22.78
47	1	33477970_1	11.931	F	african american	12.07	11.897	1	23.1
48	1	33587309_1	11.337	M	African american	11.6	11.505	1	25.02
49	2	33722737_2	11.46	F	Caucasian (jewish)	11.78	11.632	1	23.97
50	2	33909322_2	11.887	M	latino (argentinian)	12.21	12.023	2	23.91
51	1	33962479_1	11.922	F	caucasian	11.98	11.969	2	22.5
52	2	33962479_2	11.929	F	caucasian	12.06	11.862	2	22.2
53	1	34391106_1	11.899	M	african american	11.32	12.025	1	23.54
54	2	35015353_2	11.129	M	hispanic-latino	11.24	11.273	2	20.99
55	2	35204695_2	11.934	M	caucasian	11.87	11.733	1	23.16
56	1	35760105_1	11.224	M	chinese	11.14	11.237	1	24.21
57	1	368211_1	11.469	F	African american	11.76	11.37	1	23.04
58	1	3696341_1	11.968	F	african american	12.08	11.814	1	23.86
59	1	371289_1	11.947	F	caucasian	11.72	11.873	1	24.06
60	1	373834_1	12.631	M	african american	12.89	12.571	1	24.87
61	1	3922103_1	10.88	F	chinese	11.09	10.801	1	24.31
62	1	4099699_1	12.087	F	african american	12.24	12.06	1	27.63
63	2	4099699_2	12.096	F	african american	12.07	12.075	1	27.72
64	1	41095911_1	11.386	F	filipino	11.43	11.232	1	23.09
65	2	41095911_2	11.473	F	filipino	11.48	11.364	1	23.06
66	1	41300396_1	12.233	F	filipino	12.35	12.144	1	24.03
67	1	41439360_1	11.322	F	asian (korean)	11.35	11.309	2	22.65
68	2	41506156_2	11.484	F	Chinese	11.65	11.556	2	23.04
69	2	41506164_2	12.25	M	caucasian	12.16	12.188	1	26.74
70	1	41690941_1	11.589	M	caucasian	11.52	11.507	2	22.24
71	2	41690941_2	11.554	M	caucasian	11.44	11.431	2	22.12
72	2	41920831_2	11.21	F	mexican	11.1		1	23.74
73	2	42307343_2	11.138	F	asian (chinese)	11.25	11.244	1	23.29
74	1	42874809_1	11.959	F	chinese	12.25	11.885	1	27.14
75	1	42875864_1	11.554	M	Korean	11.6	11.688	1	24.4
76	1	42879029_1	11.593	F	chinese	11.63	11.493	1	24.08
77	1	42968099_1	11.998	F	chinese	12.18	12.166	1	24.33
78	2	43140086_2	11.196	F	Caucasian	11.89	11.322	2	21.98
79	1	43299107_1	12.973	F	African american	13.21	12.879	1	23.97
80	1	43302507_1	11.684	M	asian (chinese)	11.72	11.528	1	23.92
81	1	43350463_1	12.847	M	caucasian (british)	11.9	12.717	1	25.51
82	2	43401939_2	11.71	F	japanese	11.72	11.665	1	25.66
83	1	43781154_1	11.946	F	asian (chinese)	11.71	11.998	2	22.02
84	2	44071240_2	12.218	M	African american	11.92	11.988	1	24.12
85	1	44101653_1	11.684	M	caucasian	11.47	11.636	1	23.27
86	2	44318440_2	12.035	M	caucasian	12.23	12.32	1	25.15
87	1	44751429_1	11.938	M	Indian	11.88	12.014	1	25.25
88	2	45119980_2	11.928	M	Caucasian	12.2	11.979	1	25.31
89	2	45183947_2	11.803	M	caucasian	12.13	11.686	1	24.11
90	2	45480593_2	11.184	F	korean	11.6	11.494	2	23.61
91	2	45555518_2	11.569	F	chinese	11.36	11.495	1	23.08
92	1	45642364_1	11.335	F	native american	11.46	11.321	1	23.39
93	2	45642364_2	11.319	F	native american	11.43	11.18	1	23.24
94	1	45826562_1	12.589	M	caucasian	12.44	12.44	1	25.95
95	1	46005678_1	11.649	M	Chinese	11.78	11.843	1	24.3
96	1	46093887_1	11.294	F	korean	11.61	11.393	1	25.32
97	1	46220765_1	11.12	M	vietnamese	11.43	11.063	1	23.3
98	2	46285379_2	10.795	F	Chinese	10.42	10.824	1	26.48
99	1	46368444_1	12.003	F	Caucasian	12.02	12.068	2	23.91
100	2	46368444_2	11.746	F	Caucasian	12.23	11.838	2	24.06
101	2	46484614_2	12.076	M	asian (chinese-hawaiian)	12.24	12.159	1	26.45
102	1	46555848_1	11.39	F	japanese	11.75	11.72	1	24.65
103	1	46619099_1	11.458	M	chinese	11.78	11.385	2	24.04
104	1	46713249_1	11.22	F	Hispanic (Nicaraguan)	11.65	11.239	1	22.22
105	1	46940580_1	11.795	M	caucasian	11.65	11.895	1	23.86
106	2	47054001_2	12.081	F	African american	12.24	11.939	2	22.42
107	1	47328292_1	11.248	M	caucasian	11.56	11.422	1	22.08
108	1	47864500_1	12.066	M	Caucasian	11.83	12.03	1	23.59
109	1	47980682_1	12.129	M	filipino	12.4	12.038	2	23.86
110	2	47980682_2	12.222	M	filipino	12.41	12.132	2	24.4
111	2	4854748_2	11.078	F	Caucasian	11.61	11.018	2	24.22
112	1	4878981_1	11.102	F	african american	11.36	11.001	1	22.85
113	1	49007841_1	11.951	F	filipino	12.04	12.151	1	24.39
114	2	49007841_2	12.156	F	filipino	12.06	12.186	1	24.12
115	1	49469900_1	11.224	F	filipino	11.5	11.287	1	22.58
116	2	49469900_2	11.216	F	filipino	11.53	11.165	1
117	2	49681437_2	11.285	F	asian (Chinese)	11.31	11.136	2	21.15
118	1	49840055_1	11.533	M	chinese	11.63	11.425	1	27.9
119	2	49905793_2	11.457	F	chinese	11.66	11.358	2	22.7
120	1	4993420_1	11.749	F	african american	11.96	11.419	1	23.92
121	1	50357350_1	12.241	M	caucasian	12.5	12.401	1	24.78
122	1	50594688_1	11.863	F	filipino	11.48	11.785	1	24.59
123	2	50646785_2	11.266	F	chinese	11.37	11.349	1	22.24
124	1	51723422_1	11.4	F	Vietnamese	11.65	11.224	2	23.49
125	2	51723422_2	11.551	F	Vietnamese	11.5	11.462	2	23.56
126	1	51875974_1	12.043	F	Indian	12.17	11.926	1	25.31
127	1	51944526_1	11.719	M	latino (chilean)	11.8	11.83	2	21.58
128	2	51944526_2	11.775	M	latino (chilean)	11.65	11.873	2	21.58
129	1	52024943_1	11.557	M	vietnamese	11.58	11.36	1	23.37
130	1	52431832_1	11.786	F	caucasian (???)	11.91	12.053	1	22.19
131	1	52439248_1	12.173	F	Korean	11.71	12.161	2	22.43
132	2	52439248_2	12.103	F	Korean	11.95	12.199	2	22.53
133	1	5481147_1	11.284	F	caucasian	11.77	11.558	2	24.18
134	1	5514011_1	11.435	F	African american	11.31	11.312	1	42.48
135	1	55661596_1	11.585	M	chinese	12.01	11.846	1	27.1
136	1	5567483_1	11.437	F	chinese	11.56	11.385	1	25.18
137	1	55813949_1	10.995	M	caucasian	11.64	10.976	2	24.12
138	1	55878730_1	11.074	F	Vietnamese	11.17	11.068	1	23.98
139	1	56134875_1	11.793	F	chinese	11.98	11.834	1	26.5
140	2	56842977_2	12.015	F	filipino	12.41	12.069	1	25.5
141	1	57073446_1	11.925	M	vietnamese	11.85	11.94	1	26.2
142	1	57091037_1	10.941	M	vietnamese	11.17	10.936	1	28.36
143	2	57774126_2	11.895	M	caucasian (italian)	12.37	11.848	1	25.14
144	2	5781906_2	11.911	F	Caucasian	11.95	11.958	1	25.93
145	2	57932724_2	10.896	F	asian (Vietnamese)	11.2	11.092	2	21.9
146	1	58248347_1	11.537	F	Vietnamese	11.43	11.554	1	23.42
147	2	58678619_2	11.797	M	Indian	12.37	11.568	2	23.87
148	2	58999148_2	11.909	F	Caucasian	11.67	12.154	1	23.33
149	1	59359100_1	11.875	F	japanese	11.75	12.04	1	26.12
150	2	59359100_2	11.859	F	japanese	11.7	11.83	1	25.96
151	1	59601385_1	11.827	F	filipino	11.79	11.928	1	23.88
152	1	59609661_1	10.923	F	vietnamese	11.1	10.842	1	22.55
153	2	59873164_2	12.022	F	Caucasian	12.51	12.202	2	23.55
154	2	61149473_2	11.483	F	japanese	11.77	11.654	1	25.56
155	1	61189823_1	11.194	M	filipino	11.74	11.257	2	23.06
156	1	61260153_1	11.548	M	hispanic	11.83	11.742	2	23.4
157	2	6719015_2	12.029	F	African american	13.34	12.478	1	25.15
158	1	7270810_1	12.333	M	caucasian	12.53	12.375	2	26.05
159	1	7522592_1	11.148	M	chinese-spanish	11.54	11.237	1	23.55
160	1	8109621_1	11.759	F	caucasian	11.8	12.009	1	24.93
161	2	8109621_2	11.897	F	caucasian	11.78	12.006	1	25.69
162	2	8134332_2	11.787	F	Caucasian (jewish)	11.9	11.573	1	22.69
163	1	8968152_1	11.891	M	caucasian	12.03	11.826	1
164	2	8968152_2	11.706	M	caucasian	11.84	11.625	1	23.65
165	2	901652_2	11.811	F	african american	11.67	11.568	1	25.9
166	1	968102_1	12.004	F	African american	12.21	11.941	1	23.82
